# Supplementary material for: Practical Liposomal Formulation for Taxanes with Polyethoxylated Castor Oil and Ethanol with Complete Encapsulation Efficiency and High Loading Efficiency
Source: MDPI journal article supplement (doi:10.3390/nano7100290), 2017-09-23
Supplement: s1 [file s1]

# Supplementary Nanomaterials: Practical Liposomal Formulation for Taxanes with Polyethoxylated Castor Oil and Ethanol with Complete Encapsulation Efficiency and High Loading Efficiency

Tsukasa Shigehiro <sup>1,2</sup>, Junko Masuda <sup>1</sup>, Shoki Saito <sup>1</sup>, Apriliana C. Khayrani <sup>1</sup>, Kazumasa Jinno <sup>1</sup>, Akimasa Seno <sup>1</sup>, Arun Vaidyanath <sup>1</sup>, Akifumi Mizutani <sup>1</sup>, Tomonari Kasai <sup>1</sup>, Hiroshi Murakami <sup>1</sup>, Ayano Satoh <sup>1</sup>, Tetsuya Ito <sup>3</sup>, Hiroki Hamada <sup>4</sup>, Yuhki Seno <sup>5</sup>, Tadakatsu Mandai <sup>5</sup> and Masaharu Seno <sup>1,\*</sup>.

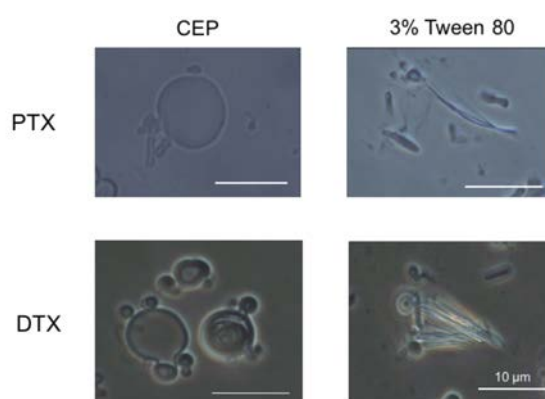

**Figure S1.** MLV formulations after suspension of lipid film containing taxanes with CEP or 3 volume% Tween 80. Lipid-film composed of HSPC, Chol, mPEG-DSPE, and either PTX or DTX (60:40:5:10 or 60:40:5:20 molar ratio, respectively) was suspended in either CEP or 3% Tween 80. Once the lipid film was suspended in indicated solvent, MLVs were observed under an inverted microscope (IX81, Olympus, Tokyo, Japan) with an objective lens of 100x magnification. The bars indicate 10  $\mu$ m.

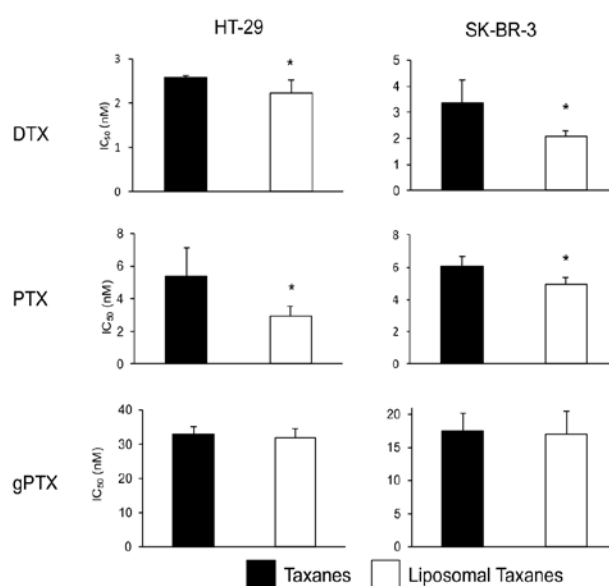

**Figure S2.** Cytotoxicity of liposomal taxanes after 72 h drug exposure. The IC<sub>50</sub>s of the liposomal taxanes after 72 h drug exposure were determined from survival curve assessed by the MTT assay.

\*  $P < 0.05$ ;  $N = 5$ .

**Table S1.** Characteristics of liposomes encapsulating taxanes.

| Drug formulation | Drug ratio (mol%) | Particle size (nm) | Zeta potential (mV) | PDI           |
|------------------|-------------------|--------------------|---------------------|---------------|
| DTX-L            | 10                | 163.4 ± 18.2       | -7.66 ± 4.62        | 0.131 ± 0.018 |
|                  | 20                | 148.1 ± 16.1       | -4.65 ± 1.25        | 0.130 ± 0.030 |
|                  | 30                | 185.7 ± 14.2       | -5.22 ± 3.05        | 0.115 ± 0.021 |
| PTX-L            | 5                 | 127.2 ± 27.1       | -3.91 ± 2.96        | 0.197 ± 0.019 |
|                  | 10                | 128.4 ± 22.6       | -4.21 ± 2.22        | 0.165 ± 0.013 |
|                  | 20                | 142.3 ± 12.0       | -5.77 ± 4.00        | 0.198 ± 0.122 |
| gPTX-L           | 10                | 174.5 ± 16.5       | -4.00 ± 1.46        | 0.162 ± 0.020 |
|                  | 20                | 171.3 ± 19.7       | -4.18 ± 2.84        | 0.174 ± 0.022 |
|                  | 30                | 161.3 ± 25.5       | -3.21 ± 1.42        | 0.189 ± 0.023 |

All data are depicted as mean ± S.D. where  $N = 4$ .
